# Supplementary material for: Ideal N-doped carbon nanoarchitectures evolved from fibrils for highly efficient oxygen reduction
Source: Royal Society of Chemistry journal article supplement (doi:10.1039/c4ta04450a), 2014-10-14
Supplement: c4ta04450a1.pdf [file c4ta04450a1.pdf]

## Supporting Information

### **Ideal N-doped carbon nanoarchitectures evolved from fibrils for highly efficient oxygen reduction**

*Yiyin Huang,<sup>a</sup> Peng Wu,<sup>a</sup> Yaobing Wang,<sup>a\*</sup> Wenjing Wang,<sup>a</sup> Daqiang Yuan<sup>a</sup> and Jiannian Yao<sup>b</sup>*

<sup>a</sup> State Key Laboratory of Structural Chemistry, Key Laboratory of design and assembly of functional nanostructures, Fujian Institute of Research on the Structure of Matter, Chinese Academy of Sciences, Yangqiao West Road 155#, Fuzhou, 350002, P. R. China

Tel: 0591-22853916; E-mail: wangyb@fjirsm.ac.cn

<sup>b</sup> Beijing National Laboratory for Molecular Sciences (BNLMS), Institute of Chemistry, Chinese Academy of Sciences, Beijing, 100190, P. R. China

E-mail: jnyao@iccas.ac.cn

The crystallite size ( $D$ ) of the planes corresponding to C (100) and (002) diffraction peaks were estimated by using the Scherrer equation as follows<sup>[S1]</sup>. The calculated values were 1.7~2.8 nm and 0.8~1.0 nm, respectively. The average number of graphitic stacked layers in the catalytic materials was calculated by dividing the interplanar spacing of (002) (~0.35 nm).

$$D = \frac{K\lambda}{\beta \cos \theta} \quad (1)$$

where  $\lambda$  denotes the wavelength of X-ray (1.5418 Å),  $\theta$  is the diffraction angle of the corresponding peak,  $\beta$  is half-peak width and  $K$  equals to 0.89.

The overall electron transfer numbers per oxygen molecule involved in a typical ORR process were calculated from the slopes of the Koutecky-Levich (K-L) plots using the following equations:<sup>[S2,S3]</sup>

$$J^{-1} = (J_L)^{-1} + (J_K)^{-1} = (B\omega^{0.5})^{-1} + (J_K)^{-1} \quad (2)$$

$$B = 0.2nFC_0(D_0)^{2/3}\nu^{-1/6} \quad (3)$$

Where  $J$  is the measured current;  $J_L$  and  $J_K$  are the diffusion- and kinetic- limiting currents, respectively;  $B$  is the reciprocal of the slope;  $\omega$  is the electrode rotating speed in rpm;  $n$  is the electron transfer numbers per oxygen molecule;  $F$  is the Faraday constant (96485 C mol<sup>-1</sup>);  $C_0$  is the concentration of O<sub>2</sub>;  $D_0$  is the diffusion coefficient of O<sub>2</sub> and  $\nu$  is the kinematic viscosity of the electrolyte.  $C_0$ ,  $D_0$  and  $\nu$  are  $1.2 \times 10^{-3}$  M,  $1.9 \times 10^{-5}$  cm<sup>2</sup> s<sup>-1</sup>, and 0.01 cm<sup>2</sup> s<sup>-1</sup> for O<sub>2</sub>-saturated 0.1 M KOH, respectively, in this study.

### Supporting information for evaluating the cost of the NACC or NFTC sample:

Preparing 1 kg NACC or NFTC needs: (price is based on U.S. dollar)

Ammonia: \$ 390.0 (80 scem × 60 min × 12 h / 1000 ml L<sup>-1</sup> / 22.4 L mol<sup>-1</sup> × 17 g mol<sup>-1</sup> × \$ 9.0 kg<sup>-1</sup>)

Absorbent cotton or facial tissue: about \$ 50.0

Electric charge: less than \$ 400.0

Therefore, it takes less than \$ 1000.0 for the raw-materials and electricity to prepare 1 kg catalytic material. 1 kg 20 wt.% Pt/C needs about \$70 000.0 (Fuel cell store, <http://www.fuelcellstore.com/en/pc/viewCategories.asp?idCategory=79>), it is over 50 times higher than the cost of preparing 1 kg NACC or NFTC. Considering that entire preparation process is quite simple, these novel materials exhibit huge competitive advantage in total cost compared to the commercial Pt/C catalyst.

### Reference for supporting information:

[S1] M. Zhong, E. K. Kim, J. P. McGann, S. E. Chun, J. F. Whitacre, M. Jaroniec, K. Matyjaszewski, T. Kowalewski. *J. Am. Chem. Soc.* **2012**, *134*, 14846.

[S2] Y. Liang, Y. Li, H. Wang, J. Zhou, J. Wang, T. Regier, H. J. Dai. *Nat. Mater.* **2011**, *10*, 780.

[S3] U. A. Paulus, T. J. Schmidt, H. A. Gasteiger, R. J. Behm. *J. Electroanal. Chem.* **2001**, *495*, 134.

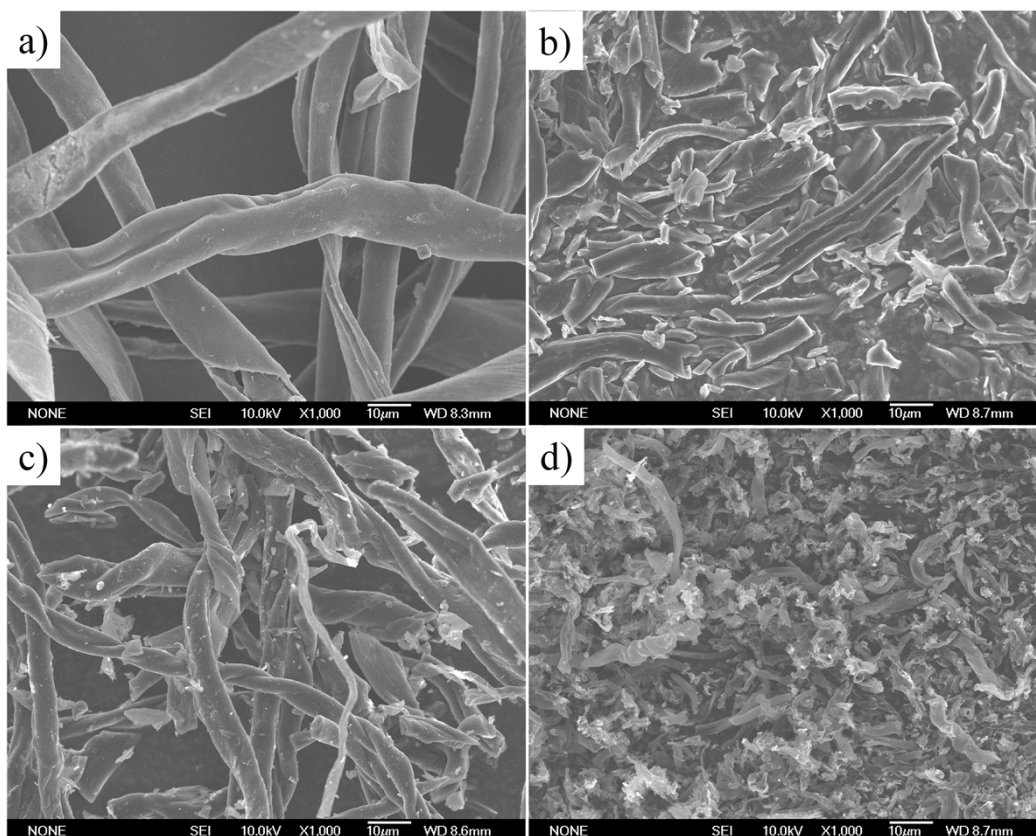

**Figure S1.** Typical scanning electron microscopy (SEM) images of a) absorbent cotton, b) NACC-650, c) NACC-800 and d) NACC-1050.

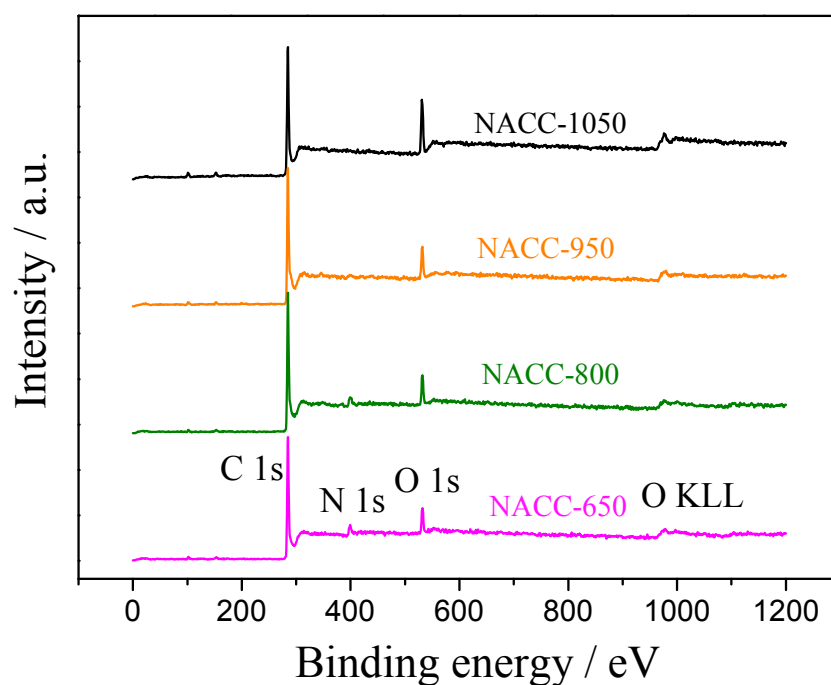

**Figure S2.** XPS spectra of the NACC materials

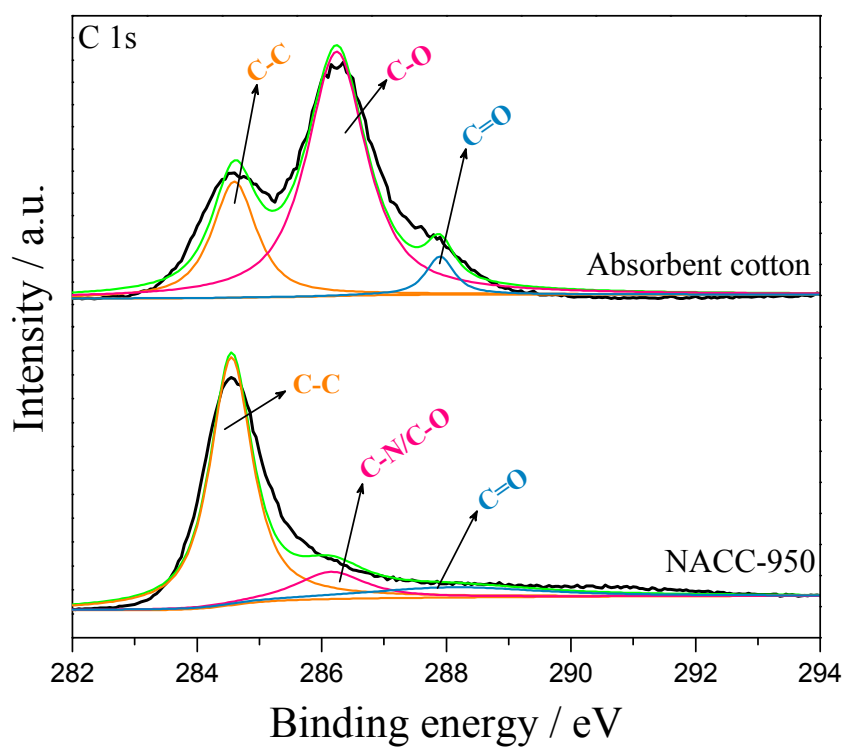

**Figure S3.** High resolution C 1s XPS spectra of absorbent cotton and NACC-950.

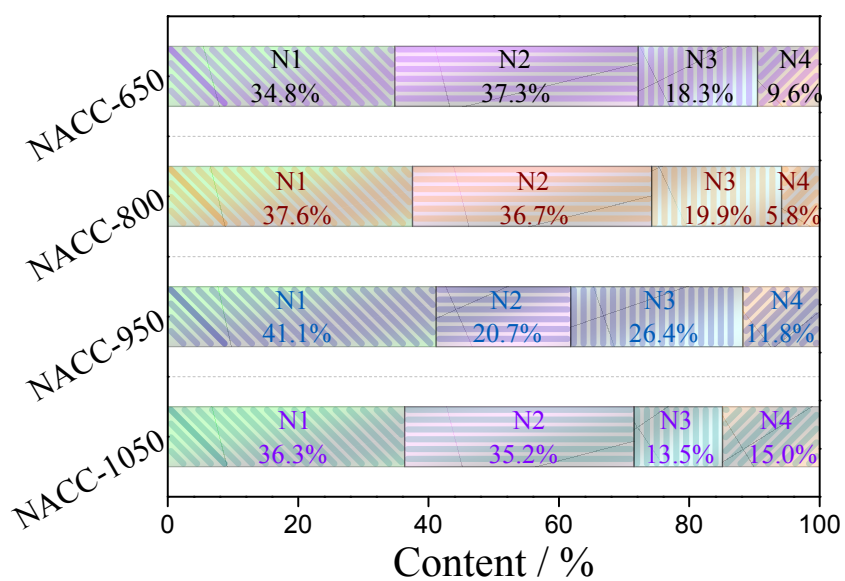

**Figure S4.** Relative ratios of the deconvoluted peak areas of N 1s XPS spectra.

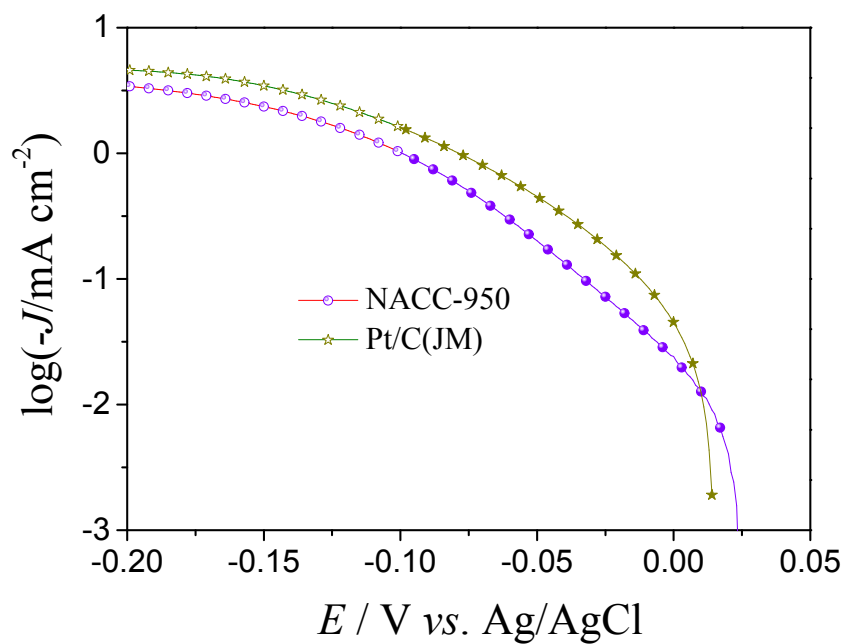

**Figure S5.** Diffusion-corrected Tafel plots for ORR on NACC-950 and Pt/C. Catalyst loading was  $0.10 \text{ mg cm}^{-2}$ .

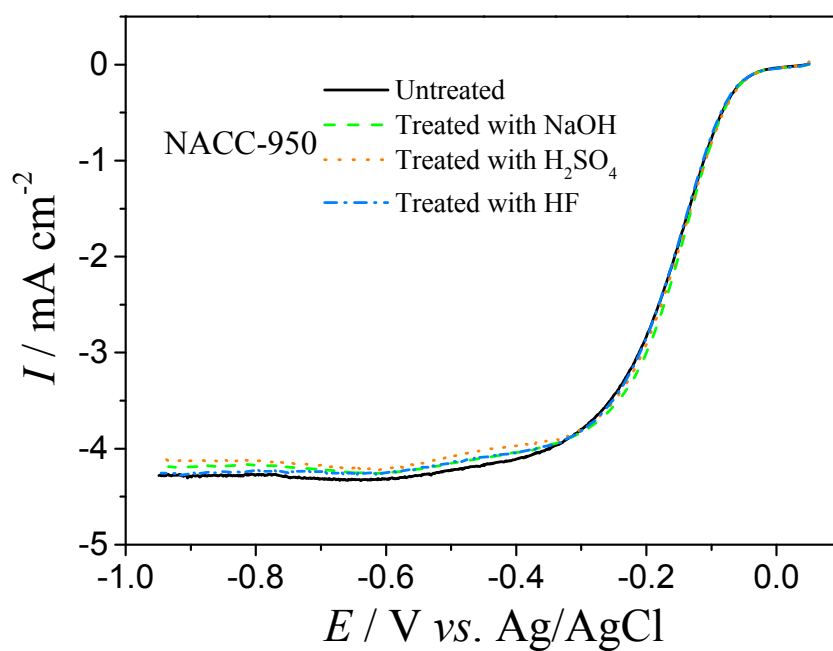

**Figure S6.** Rotating-disk voltammograms of NACC-950 with or without acid/alkali treatment at the sweep rate of  $5 \text{ mV s}^{-1}$  in  $\text{O}_2$ -saturated  $0.1 \text{ M KOH}$ . Catalyst loading for all samples was  $0.10 \text{ mg cm}^{-2}$ .

**Table S1.** Comparison of electrochemical performance of commercial Pt/C and the prepared catalytic materials.

|                                                                                    | Pt/C  | NACC<br>-1050 | NACC<br>-950 | NACC<br>-800 | NACC<br>-650 | NACC<br>-950 | NFTC  | NFPC  | NAPC  |
|------------------------------------------------------------------------------------|-------|---------------|--------------|--------------|--------------|--------------|-------|-------|-------|
| <b>Catalyst loading (mg cm<sup>-2</sup>)</b>                                       | 0.10  | 0.10          | 0.10         | 0.10         | 0.10         | 0.30         | 0.30  | 0.30  | 0.30  |
| <b>Coulombic charge between -0.8 and 0.4 V of the dash lines in Figure 4a (mC)</b> | 4.55  | 1.92          | 3.59         | 4.58         | 0.24         | —            | —     | —     | —     |
| <b>Onset potential in LSV (<math>E_{onset}</math>, V)</b>                          | 0.00  | -0.06         | -0.01        | -0.10        | -0.27        | 0.00         | 0.00  | 0.00  | -0.03 |
| <b>Half-wave potential in LSV (<math>E_{1/2}</math>, V)</b>                        | -0.12 | -0.17         | -0.13        | -0.25        | -0.38        | -0.12        | -0.12 | -0.13 | -0.18 |
| <b>Current at -0.2 V in LSV (mA cm<sup>-2</sup>)</b>                               | 4.65  | 2.37          | 3.46         | 0.48         | 0.01         | 4.13         | 4.11  | 3.42  | 1.50  |
| <b>Limiting current at -0.95 V in LSV (mA cm<sup>-2</sup>)</b>                     | 5.03  | 4.09          | 4.42         | 3.03         | 2.46         | 5.09         | 5.73  | 5.26  | 3.64  |
| <b>Electron transfer number (n) at -0.6 V in LSV</b>                               | 3.98  | 3.49          | 3.81         | 2.84         | 2.13         | —            | —     | —     | —     |

**Table S2.** Comparison of ORR performance of some N-doped carbon materials in literature.

| Source/References                                                                  | Solution  | Loading (mg cm <sup>-2</sup> ) | Activity (V vs. Ag/AgCl)                 |
|------------------------------------------------------------------------------------|-----------|--------------------------------|------------------------------------------|
| <b>In this work (NACC-950)</b>                                                     | 0.1 M KOH | 0.30                           | $E_{onset} = 0.00$<br>$E_{1/2} = -0.12$  |
| Angew. Chem. Int. Ed. 2014, 53, 1570–1574<br><b>(N-doped carbon nanosheets)</b>    | 0.1 M KOH | 0.60                           | $E_{onset} = -0.01$<br>$E_{1/2} = -0.13$ |
| J. Am. Chem. Soc., 2011, 133, 206–209<br><b>(Mesoporous N-doped carbon)</b>        | 0.1 M KOH | 0.66                           | $E_{onset} = -0.0035$                    |
| Adv. Mater. 2013, 25, 998–1003<br><b>(N-doped carbon spheres)</b>                  | 0.1 M KOH | Not mentioned                  | $E_{onset} = 0.00$<br>$E_{1/2} = -0.10$  |
| Adv. Mater. 2013, 25, 6226–6231<br><b>(N-doped Graphene/Ordered Porous Carbon)</b> | 0.1 M KOH | 0.42                           | $E_{onset} = -0.05$                      |

**Table S3.** Content of metallic impurities in NACC-950 as determined by ICP-OES analysis.

| Impurity | Content (wt.%) |
|----------|----------------|
| Co       | 0.0002         |
| Fe       | 0.0252         |
| Mn       | 0.0007         |
| Ni       | 0.0015         |
